# Supplementary material for: Viral and Cellular Proteins Containing FGDF Motifs Bind G3BP to Block Stress Granule Formation
Source: PubMed Central journal article supplement (PMC4450067; doi:10.1371/journal.ppat.1004659), 2015-02-06
Supplement: ppat.1004659.s009.pdf [file ppat.1004659.s009.pdf]

| Gene Name   | Protein Name                                                           | Length (aa) | Location    | Pattern                                     | UniProt ID             |
|-------------|------------------------------------------------------------------------|-------------|-------------|---------------------------------------------|------------------------|
| <b>FGDF</b> |                                                                        |             |             |                                             |                        |
| ASTN2       | Astrotactin-2.                                                         | 1339        | 1247 - 1250 | NSHYEK <b>FGDF</b> VWRSEDE                  | <a href="#">O75129</a> |
| BTA1        | TATA-binding protein-associated factor 172                             | 1849        | 355 - 358   | VFALDR <b>FGDF</b> VSDVVA                   | <a href="#">O14981</a> |
| CS044       | Uncharacterized protein C19orf44.                                      | 657         | 15 - 18     | RPMRDV <b>FGDF</b> SDVSL <b>ED</b>          | <a href="#">Q9H6X5</a> |
| DCBD2       | Discoidin, CUB and LCCL domain-containing protein 2                    | 775         | 115 - 118   | ERVRIK <b>FGDF</b> DI <b>ED</b> SDS         | <a href="#">Q96PD2</a> |
| DHX37       | Probable ATP-dependent RNA helicase DHX37                              | 1157        | 689 - 692   | LYSSAV <b>FGDF</b> EQFPPE                   | <a href="#">Q8IY37</a> |
| DPOLB       | DNA polymerase beta                                                    | 335         | 143 - 146   | RIGLKY <b>FGDF</b> EKRI <b>PRE</b>          | <a href="#">P06746</a> |
| FRPD4       | FERM and PDZ domain-containing protein 4                               | 1322        | 655 - 658   | AKVSFI <b>FGDF</b> ALDDGIS                  | <a href="#">Q14CM0</a> |
| PPARG       | Peroxisome proliferator-activated receptor gamma                       | 505         | 388 - 391   | KSLRKP <b>FGDF</b> MEPK <b>FEF</b>          | <a href="#">P37231</a> |
| PTN21       | Tyrosine-protein phosphatase non-receptor type 21                      | 1174        | 152 - 155   | LAVQAD <b>FGDF</b> DQ <b>YESQD</b>          | <a href="#">Q16825</a> |
| RAD21       | Double-strand-break repair protein rad21 homolog                       | 631         | 160 - 163   | ILQEND <b>FGDF</b> GMDDREI                  | <a href="#">O60216</a> |
| TTC23       | Tetratricopeptide repeat protein 23                                    | 447         | 348 - 351   | EAKVEA <b>FGDF</b> SP <b>EV</b> A <b>ET</b> | <a href="#">Q5W5X9</a> |
| USP10       | Ubiquitin carboxyl-terminal hydrolase 10                               | 798         | 10 - 13     | HSPQYI <b>FGDF</b> SP <b>DE</b> FNQ         | <a href="#">Q14694</a> |
| <b>FGEF</b> |                                                                        |             |             |                                             |                        |
| ASTN1       | Astrotactin-1                                                          | 1302        | 1210 - 1213 | NQHYES <b>FGEF</b> TWRCEDE                  | <a href="#">O14525</a> |
| CLCN6       | Chloride transport protein 6                                           | 869         | 314 - 317   | LPGLLN <b>FGEF</b> KCS <b>DS</b> DK         | <a href="#">P51797</a> |
| EBLN1       | Endogenous Bornavirus-like nucleoprotein 1                             | 366         | 211 - 214   | LMFTFL <b>FGEF</b> ES <b>PAC</b> EL         | <a href="#">POCF75</a> |
| ORC4        | Origin recognition complex subunit 4                                   | 436         | 129 - 132   | EKIREY <b>FGEF</b> GE <b>IE</b> A <b>IE</b> | <a href="#">O43929</a> |
| ROAA        | Heterogeneous nuclear ribonucleoprotein A/B                            | 332         | 174 - 177   | EKIREY <b>FGEF</b> GE <b>IE</b> A <b>IE</b> | <a href="#">Q99729</a> |
| <b>FGSF</b> |                                                                        |             |             |                                             |                        |
| FMN1        | Formin-1                                                               | 1419        | 250 - 253   | PDTD <b>LFGSF</b> ETAFKDT                   | <a href="#">Q68DA7</a> |
| ITB5        | Integrin beta-5                                                        | 799         | 179 - 182   | SNFRL <b>FGSF</b> V <b>DK</b> DISP          | <a href="#">P18084</a> |
| KI2L1       | Killer cell immunoglobulin-like receptor 2DL1                          | 348         | 199 - 203   | GGTYRC <b>FGSF</b> H <b>DS</b> PYEW         | <a href="#">P43626</a> |
| KI2L2       | Killer cell immunoglobulin-like receptor 2DL2                          | 348         | 199 - 202   | GGTYRC <b>FGSF</b> RDSPYEW                  | <a href="#">P43627</a> |
| KI2S3       | Killer cell immunoglobulin-like receptor 2DS3                          | 304         | 199 - 203   | GGTYRC <b>FGSF</b> H <b>DS</b> PYEW         | <a href="#">Q14952</a> |
| KI3P1       | Putative killer cell immunoglobulin-like receptor like protein KIR3DP1 | 328         | 294 - 297   | GGTYRC <b>FGSF</b> RDSPYEW                  | <a href="#">A8MWS1</a> |
| LIRA1       | Leukocyte immunoglobulin-like receptor subfamily A member              | 489         | 151 - 154   | CVSQVA <b>FGSF</b> FILCKE <b>GE</b>         | <a href="#">O75019</a> |
| LONP2       | Lon protease homolog 2, peroxisomal                                    | 852         | 717 - 720   | YQLTNA <b>FGSF</b> DL <b>LD</b> NTD         | <a href="#">Q86WA8</a> |
| LR14B       | Leucine-rich repeat-containing protein 14B                             | 514         | 477 - 480   | QVSTPL <b>FGSF</b> DPDI <b>Q</b> ET         | <a href="#">A6NHZ5</a> |
| MAP1B       | Microtubule-associated protein 1B                                      | 2468        | 1510 - 1513 | QIDVSQ <b>FGSF</b> K <b>ED</b> TRMS         | <a href="#">P46821</a> |
| N4BP2       | NEDD4-binding protein 2                                                | 1770        | 1099 - 1102 | NILCKL <b>FGSF</b> SL <b>E</b> ALKD         | <a href="#">Q86UW6</a> |
| PO4F3       | POU domain, class 4, transcription factor 3                            | 338         | 46 - 49     | QLQGN <b>IFGSF</b> DESLLAR                  | <a href="#">Q15319</a> |
| RGS1        | Regulator of G-protein signaling 1                                     | 209         | 99 - 102    | QTGQNV <b>FGSF</b> FLK <b>SE</b> FSE        | <a href="#">Q08116</a> |
| SELO        | Selenoprotein O                                                        | 669         | 254 - 257   | ASTF <b>IFGSF</b> E <b>IF</b> KSAD          | <a href="#">Q9BVL4</a> |
| SODM        | Superoxide dismutase [Mn], mitochondrial                               | 222         | 125 - 128   | EAIKR <b>DFGSF</b> DK <b>FK</b> EKL         | <a href="#">P04179</a> |
| UNC80       | Protein unc-80 homolog                                                 | 3258        | 494 - 497   | TRST <b>FSFGSF</b> SGL <b>GE</b> DR         | <a href="#">Q8N2C7</a> |
| VILI        | Villin-1                                                               | 827         | 37 - 40     | PVPSST <b>FGSF</b> FDG <b>DC</b> YI         | <a href="#">P09327</a> |

**Table S1**
