# Supplementary material for: Viral and Cellular Proteins Containing FGDF Motifs Bind G3BP to Block Stress Granule Formation
Source: PubMed Central journal article supplement (PMC4450067; doi:10.1371/journal.ppat.1004659), 2015-02-06
Supplement: ppat.1004659.s010.pdf [file ppat.1004659.s010.pdf]

| Gene Name   | Protein Name                                  | Length (aa) | Virus                                            | Virus family  | Genome | Location                   | Pattern                                                                                                                | UniProt ID             |
|-------------|-----------------------------------------------|-------------|--------------------------------------------------|---------------|--------|----------------------------|------------------------------------------------------------------------------------------------------------------------|------------------------|
| <b>FGDF</b> |                                               |             |                                                  |               |        |                            |                                                                                                                        |                        |
| DNBI_HHV11  | Major DNA-binding protein                     | 1196        | HHV-1 Human herpes simplex virus 1               | Herpesviridae | dsDNA  | 1144 - 1147                | AGEVFN <b>FGDF</b> GC <b>EDD</b> NA                                                                                    | <a href="#">P04296</a> |
| DNBI_HHV1F  | Major DNA-binding protein                     | 1196        | HHV-1 Human herpes simplex virus 1 (strain F)    | Herpesviridae | dsDNA  | 1144 - 1147                | AGEVFN <b>FGDF</b> GC <b>EDD</b> NA                                                                                    | <a href="#">P17469</a> |
| DNBI_HHV1K  | Major DNA-binding protein                     | 1196        | HHV-1 Human herpes simplex virus 1 (strain KOS)  | Herpesviridae | dsDNA  | 1144 - 1152                | AGEVFN <b>FGDF</b> GC <b>EDD</b> NA                                                                                    | <a href="#">P17470</a> |
| DNBI_HHV2   | Major DNA-binding protein                     | 1197        | HHV-2 Human herpes simplex virus 2               | Herpesviridae | dsDNA  | 1144 - 1147                | AGEVFN <b>FGDF</b> GD <b>ADD</b> HA                                                                                    | <a href="#">P36384</a> |
| DNBI_HHV2H  | Major DNA-binding protein                     | 1196        | HHV-2 Human herpes simplex virus 2 (strain HG52) | Herpesviridae | dsDNA  | 1144 - 1147                | AGEVFN <b>FGDF</b> GD <b>EDD</b> HA                                                                                    | <a href="#">P89452</a> |
| HELI_EBVB9  | DNA replication helicase                      | 809         | Epstein-Barr virus (strain B95-8)                | Herpesviridae | dsDNA  | 479 - 482                  | CGYTGT <b>FGDF</b> MD <b>TL</b> E <b>AD</b>                                                                            | <a href="#">P03214</a> |
| POLN_AURAV  | Non-structural polyprotein                    | 2498        | Aura virus                                       | Togaviridae   | +ssRNA | 1845 - 1848<br>1865 - 1868 | LSMPIT <b>FGDF</b> A <b>EGE</b> L <b>DR</b><br>PSPTPT <b>FGDF</b> S <b>Q</b> E <b>EMDR</b>                             | <a href="#">Q86924</a> |
| POLN_BFV    | Non-structural polyprotein                    | 2410        | Barmah Forest virus                              | Togaviridae   | +ssRNA | 1760 - 1763<br>1778 - 1781 | MHPGFT <b>FGDF</b> G <b>HE</b> V <b>EE</b><br>TASPLT <b>FGDF</b> A <b>EGE</b> I <b>QG</b>                              | <a href="#">P87515</a> |
| POLN_CHIK3  | Non-structural polyprotein                    | 2474        | Chikungunya virus (strain 37997)                 | Togaviridae   | +ssRNA | 1812 - 1815<br>1830 - 1833 | ETFPIT <b>FGDF</b> D <b>E</b> G <b>E</b> I <b>ES</b><br>SSELLT <b>FGDF</b> S <b>P</b> G <b>E</b> V <b>DD</b>           | <a href="#">Q5XXP4</a> |
| POLN_MAYAB  | Non-structural polyprotein                    | 2436        | Mayaro virus strain                              | Togaviridae   | +ssRNA | 1804 - 1807                | EESDIT <b>FGDF</b> S <b>AS</b> E <b>W</b> E <b>T</b>                                                                   | <a href="#">Q8QZ73</a> |
| POLN_MIDDV  | Non-structural polyprotein                    | 994         | Middelburg virus                                 | Togaviridae   | +ssRNA | 364 - 367                  | INDDL <b>T</b> <b>FGDF</b> G <b>AG</b> E <b>F</b> E <b>R</b>                                                           | <a href="#">P03318</a> |
| POLN_ONNVG  | Non-structural polyprotein                    | 2514        | O'nyong-nyong virus (strain Gulu)                | Togaviridae   | +ssRNA | 1852 - 1855<br>1870 - 1873 | TLEPIT <b>FGDF</b> A <b>EGE</b> I <b>DN</b><br>LTGALT <b>FGDF</b> E <b>P</b> G <b>E</b> V <b>EE</b>                    | <a href="#">P13886</a> |
| POLN_RRVN   | Non-structural polyprotein                    | 2479        | Ross river virus (strain NB5092)                 | Togaviridae   | +ssRNA | 1843 - 1846                | EDVDI <b>Q</b> <b>FGDF</b> E <b>T</b> P <b>D</b> KI <b>Q</b>                                                           | <a href="#">P13887</a> |
| POLN_SFV    | Non-structural polyprotein                    | 2432        | Semliki Forest virus                             | Togaviridae   | +ssRNA | 1787 - 1790<br>1804 - 1807 | NKLLPL <b>T</b> <b>FGDF</b> D <b>E</b> H <b>E</b> V <b>DA</b><br>LASGIT <b>FGDF</b> D <b>D</b> V <b>L</b> R <b>L</b> G | <a href="#">P08411</a> |
| THYX_BPMLS  | Probable thymidylate synthase                 | 243         | Mycobacterium phage L5                           | Siphoviridae  | dsDNA  | 36 - 39                    | KDEDPY <b>FGDF</b> D <b>A</b> D <b>E</b> L <b>A</b> E                                                                  | <a href="#">Q05259</a> |
| VP12_BPPRD  | Single-stranded DNA-binding protein           | 160         | Enterobacteria phage PRD1                        | Tectiviridae  | dsDNA  | 44 - 47                    | KVGQST <b>FGDF</b> IK <b>F</b> E <b>G</b> E <b>F</b>                                                                   | <a href="#">P17637</a> |
| YL032_MIMIV | Putative Kila-N domain-containing protein L32 | 372         | Acanthamoeba polyphaga mimivirus                 | Mimiviridae   | dsDNA  | 157 - 160                  | KFAIGK <b>FGDF</b> E <b>V</b> I <b>N</b> R <b>D</b>                                                                    | <a href="#">Q5UPA5</a> |

| FGEF       |                                           |      |                                                                       |                |        |             |                                                                                    |                        |
|------------|-------------------------------------------|------|-----------------------------------------------------------------------|----------------|--------|-------------|------------------------------------------------------------------------------------|------------------------|
| MREP_SCSVF | Master replication protein                | 286  | Subterranean clover stunt virus (strain F)                            | Nanoviridae    | ssDNA  | 93 - 97     | VEGPWE <b>FGEF</b> K <b>EVLE</b> DK                                                | <a href="#">Q9ICP7</a> |
| POLG_BVY3  | Genome polyprotein                        | 3491 | Blackberry virus Y (isolate Blackberry plant/USA Arkansas/C3ARK/2005) | Potyvirdae     | +ssRNA | 328 - 331   | TKTTIN <b>FGEF</b> EV <b>VD</b> GY                                                 | <a href="#">A0AUJ5</a> |
| RDRP_NODAM | RNA-directed RNA polymerase               | 1043 | Nodamura virus (strain Mag115)                                        | Nodaviridae    | +ssRNA | 239 - 242   | VWDWCA <b>FGEF</b> I <b>ET</b> R <b>D</b> AS                                       | <a href="#">Q9IMM4</a> |
| RDRP_WCCVB | RNA-directed RNA polymerase               | 616  | White clover cryptic virus 1 (isolate Boccardo/2004)                  | Partitiviridae | dsRNA  | 152 - 155   | LSQRKT <b>FGEF</b> IRM <b>H</b> E <b>Y</b> E                                       | <a href="#">Q64FP0</a> |
| FGSF       |                                           |      |                                                                       |                |        |             |                                                                                    |                        |
| COAT_BPAR1 | Major capsid protein                      | 521  | Enterobacteria phage AR1                                              | Myoviridae     | dsDNA  | 59 - 62     | EKIAQA <b>FGSFL</b> T <b>E</b> A <b>E</b> IG                                       | <a href="#">Q9ZXI0</a> |
| COAT_BPT4  | Major capsid protein                      | 521  | Enterobacteria phage T4                                               | Myoviridae     | dsDNA  | 59 - 62     | EKIAQA <b>FGSFL</b> T <b>E</b> A <b>E</b> IG                                       | <a href="#">P04535</a> |
| COAT_BPT6  | Major capsid protein                      | 502  | Enterobacteria phage T6                                               | Myoviridae     | dsDNA  | 59 - 62     | EKIAQA <b>FGSFL</b> T <b>E</b> A <b>E</b> IG                                       | <a href="#">Q38055</a> |
| ETF2_MCV1  | Early transcription factor 82 kDa subunit | 707  | Molluscum contagiosum virus subtype 1                                 | Poxviridae     | dsDNA  | 142 - 145   | DTPVPE <b>FGSF</b> EE <b>V</b> DANI                                                | <a href="#">Q98277</a> |
| MVP_LMV0   | P3N-PIPO polyprotein                      | 1152 | Lettuce mosaic virus (strain O / isolate French)                      | Potyvirdae     | +ssRNA | 131 - 134   | KCRGLQ <b>FGSF</b> T <b>E</b> L <b>E</b> T <b>S</b> E                              | <a href="#">P0CJ97</a> |
| MVP_LMVE   | P3N-PIPO polyprotein                      | 1152 | Lettuce mosaic virus (strain E)                                       | Potyvirdae     | +ssRNA | 131 - 134   | KCRGLQ <b>FGSF</b> T <b>E</b> L <b>E</b> T <b>S</b> E                              | <a href="#">P0CW79</a> |
| POL1_CRLVP | RNA1 polyprotein                          | 2250 | Cherry rasp leaf virus (isolate Potato/United States)                 | Secoviridae    | +ssRNA | 115 - 118   | ASGPCF <b>FGSFG</b> PF <b>EE</b> YY                                                | <a href="#">Q6EWG9</a> |
| POL1_CRLVP | RNA1 polyprotein                          | 2250 | Cherry rasp leaf virus (isolate Potato/United States)                 | Secoviridae    | +ssRNA | 115 - 118   | ASGPCF <b>FGSFG</b> PF <b>EE</b> YY                                                | <a href="#">Q6EWG9</a> |
| POLA_CHPVU | Polyprotein p69                           | 622  | Cryphonectria hypovirus 1 (strain Euro7)                              | Hypoviridae    | dsRNA  | 200 - 203   | WVGRRS <b>FGSF</b> Q <b>I</b> E <b>E</b> STV                                       | <a href="#">Q9YTU3</a> |
| POLG_MCFA  | Genome polyprotein                        | 3341 | Mosquito cell fusing agent CFA flavivirus                             | Flaviviridae   | +ssRNA | 2749 - 2752 | YKSFKY <b>FGSF</b> V <b>T</b> D <b>D</b> VKV                                       | <a href="#">P33515</a> |
| POLN_SINDV | Non-structural polyprotein                | 2512 | Sindbis virus                                                         | Togaviridae    | +ssRNA | 1837 - 1840 | TDVPMS <b>FGSFD</b> G <b>E</b> I <b>D</b> E<br>ESEPVL <b>FGSFE</b> P <b>G</b> EVNS | <a href="#">P03317</a> |

**Table S2**
