# Supplementary material for: Viral and Cellular Proteins Containing FGDF Motifs Bind G3BP to Block Stress Granule Formation
Source: PubMed Central journal article supplement (PMC4450067; doi:10.1371/journal.ppat.1004659), 2015-02-06
Supplement: ppat.1004659.s011.pdf [file ppat.1004659.s011.pdf]

| <b>Name</b> | <b>Sequence 5'→ 3'</b>                           | <b>Features</b>                                    |
|-------------|--------------------------------------------------|----------------------------------------------------|
| Primer 1    | CCGCAGACCATGTGGACCTCGAGAACCCG                    | XhoI restriction site                              |
| Primer 2    | <i>CGCATCGACCTCGTGCTCGTCAAAGTCGCCCGCCGTCAAAG</i> | Ala codon pos 444,<br>Overlap primer 3<br>(12bp)   |
| Primer 3    | <i>GAGGTCGATGCGTTGGCCTCCGGGATTACTGCGGGAGACTT</i> | Overlap primer 2 (12<br>bp), Ala codon pos.<br>460 |
| Primer 4    | GTCCAGCAGGTAAGTATCCACCCCTAGATCTTCGAGG            | BglIII restriction site                            |
| Primer 5    | GACTCAGATCTATGGTGTGGAG                           | BglIII restriction site                            |
| Primer 6    | <i>GAGTCTTCCATAACCATCTATGCAGCAT</i>              | Trp codon pos 33                                   |
| Primer 7    | <i>TCATTGTGAACATAACCATTTATTTGCAAC</i>            | Trp codon pos 124                                  |
| Primer 8    | <i>GGAAAGAACTCTTCTTATGTCCATGG</i>                | 11 bp overlap with<br>primer 6                     |
| Primer 9    | <i>GTCACAATGATATCTTCAGATACCAAGA</i>              | 11 bp overlap with<br>primer 7                     |
| Primer 10   | CGACTGCAGAATTCTTACTGC                            | EcoRI restriction site                             |

**Table S3**
