# Supplementary material for: Viral and Cellular Proteins Containing FGDF Motifs Bind G3BP to Block Stress Granule Formation
Source: PubMed Central journal article supplement (PMC4450067; doi:10.1371/journal.ppat.1004659), 2015-02-06
Supplement: ppat.1004659.s012.pdf [file ppat.1004659.s012.pdf]

| <b>Antigen</b>   | <b>Species</b> | <b>Application</b> | <b>Source</b>          |
|------------------|----------------|--------------------|------------------------|
| G3BP-1           | rabbit         | IF, WB             | Aviva Systems          |
| G3BP-1           | mouse          | IP, IF             | BD Transduction        |
| G3BP-2           | rabbit         | WB                 | Assay Biotech          |
| nsP3             | rabbit         | IF, WB             | (Tamberg et al., 2007) |
| USP10            | rabbit         | IF, WB             | Abcam                  |
| ICP8             | rabbit         | IF, WB             | Per Elias              |
| GFP              | rabbit         | WB                 | Abcam                  |
| GFP              | mouse          | IP                 | Abcam                  |
| Streptavidin-HRP | rabbit         | WB                 | Amersham               |
| TIA-1            | goat           | IF                 | Santa Cruz             |
| Actin            | goat           | WB                 | Santa Cruz             |

**Table S4**
