# Supplementary material for: Viral and Cellular Proteins Containing FGDF Motifs Bind G3BP to Block Stress Granule Formation
Source: PubMed Central journal article supplement (PMC4450067; doi:10.1371/journal.ppat.1004659), 2015-02-06
Supplement: ppat.1004659.s013.pdf [file ppat.1004659.s013.pdf]

## 1 **Supporting Materials and Methods**

### 2 **Plasmids construction**

3 Construction of the infectious clone pCMV-SFV-F3A: The PCR product derived from  
4 primers 1 and 2 (Table S3) and the PCR product derived from primers 3 and 4 were fused  
5 by a one-step PCR in a molar ratio of 1:1. The DNA was denatured and annealed at 46°C  
6 for 2 min. These partially double-stranded molecules were made fully double stranded by  
7 extension at 72°C for 3 min. The fusion DNA was then amplified by using primer 1 and 4  
8 for 25 cycles of PCR consisting of treatment at 95°C for 30 s, 69°C for 30 s, and 72°C for  
9 2 min, followed by a final extension at 72°C for 5 min. The derived PCR product was  
10 purified and subcloned into pTZ57R/T plasmid (Thermo Scientific). The resulting  
11 pTZ57R/T-F3A plasmid was digested with XhoI and BglII and religated to the similar  
12 digested pCMV-SFV4 vector (Ulper et al., 2008). The presence of mutations was  
13 confirmed by sequencing.

14 Construction of pEGFP-G3BP-F33W and -F124W: The PCR product derived from  
15 primers 5 and 6 (F33W) or primers 5 and 7 (F124W) and the product derived from  
16 primers 8 and 10 (F33W) or primers 9 and 10 (F124W) were fused by a one-step PCR in  
17 a molar ratio of 1:1. The DNA was denatured and annealed at 33°C for 2 min. These  
18 partially double-stranded molecules were made fully double stranded by extension at  
19 72°C for 3 min. The fusion DNAs containing the F33W mutation or F124W mutation  
20 were then amplified by using primers 5 and 10 for 25 cycles of PCR consisting of  
21 treatment at 95°C for 30 s, 56°C for 30 s, and 72°C for 2 min, followed by a final  
22 extension at 72°C for 5 min. The derived PCR product was purified and subcloned into  
23 pTZ57R/T plasmid (Thermo Scientific). The resulting pTZ57R/T-G3BP1-F33W, -  
24 F124W plasmid was digested with BglII and EcoRI and religated to the similar digested  
25 pEGFP-C1-G3BP1 vector. The presence of mutations was confirmed by sequencing.

26

### 27 **Supporting References**

28

29 Ulper, L., Sarand, I., Rausalu, K., *et al.* (2008). Construction, properties, and potential  
30 application of infectious plasmids containing Semliki Forest virus full-length cDNA with  
31 an inserted intron. *J Virol Methods* 148, 265-270.

32
